# Supplementary material for: Effects of Brines and Containers on Flavor Production of Chinese Pickled Chili Pepper (Capsicum frutescens L.) during Natural Fermentation
Source: MDPI journal article supplement (doi:10.3390/foods12010101), 2022-12-25
Supplement: s1 [file s1]

**Supplementary Table S1** Free amino acids content of pickled chili pepper processed by different procedures during 30 days' fermentation.

| Content<br>(mg/100g) | PFB               |                   |                  |                   |                   |                  | PAB                |                   |                   |                   |                   |                   |
|----------------------|-------------------|-------------------|------------------|-------------------|-------------------|------------------|--------------------|-------------------|-------------------|-------------------|-------------------|-------------------|
|                      | D0                | D1                | D4               | D7                | D14               | D30              | D0                 | D1                | D4                | D7                | D14               | D30               |
| <b>Asp</b>           | 15.35±0           | 15.36±0           | 45.89±0          | 37.80±0           | 38.39±0           | 36.37±0          | 13.19±0            | 18.91±0           | 61.33±1           | 47.59±0           | 45.93±1           | 40.87±0           |
|                      | .13 <sup>d</sup>  | .06 <sup>d</sup>  | .81 <sup>a</sup> | .80 <sup>bc</sup> | .56 <sup>b</sup>  | .13 <sup>c</sup> | .41 <sup>c</sup>   | .40 <sup>d</sup>  | .21 <sup>a</sup>  | .64 <sup>b</sup>  | .16 <sup>b</sup>  | .07 <sup>c</sup>  |
| <b>Thr</b>           | 112.76±           | 123.53±           | 94.37±0          | 80.15±1           | 103.34±           | 50.79±0          | 117.35±            | 122.90±           | 158.21±           | 110.97±           | 120.94±           | 57.23±0           |
|                      | 2.39 <sup>b</sup> | 0.73 <sup>a</sup> | .53 <sup>d</sup> | .69 <sup>c</sup>  | 1.50 <sup>c</sup> | .08 <sup>f</sup> | 4.29 <sup>bc</sup> | 2.26 <sup>b</sup> | 2.40 <sup>a</sup> | 5.32 <sup>c</sup> | 1.68 <sup>b</sup> | .44 <sup>d</sup>  |
| <b>Ser</b>           | 24.90±0           | 23.73±0           | 31.25±0          | 25.21±0           | 35.42±0           | 25.71±0          | 20.42±0            | 25.58±0           | 39.96±0           | 33.34±0           | 34.82±0           | 30.04±0           |
|                      | .98 <sup>cd</sup> | .26 <sup>d</sup>  | .78 <sup>b</sup> | .56 <sup>cd</sup> | .26 <sup>a</sup>  | .13 <sup>c</sup> | .50 <sup>c</sup>   | .17 <sup>d</sup>  | .93 <sup>a</sup>  | .47 <sup>b</sup>  | .64 <sup>b</sup>  | .03 <sup>c</sup>  |
| <b>Glu</b>           | 16.15±0           | 12.07±0           | 20.55±0          | 23.54±0           | 25.34±1           | 26.23±0          | 15.04±0            | 14.15±0           | 27.84±0           | 30.02±0           | 25.71±0           | 26.95±0           |
|                      | .69 <sup>d</sup>  | .11 <sup>c</sup>  | .17 <sup>c</sup> | .95 <sup>b</sup>  | .45 <sup>ab</sup> | .59 <sup>a</sup> | .52 <sup>d</sup>   | .13 <sup>d</sup>  | .48 <sup>b</sup>  | .78 <sup>a</sup>  | .48 <sup>c</sup>  | .65 <sup>bc</sup> |
| <b>Gly</b>           | 4.41±0.           | 6.07±0.           | 9.39±0.          | 9.76±0.           | 13.28±0           | 11.99±0          | 3.44±0.            | 5.48±0.           | 13.64±0           | 13.65±0           | 14.42±0           | 14.24±0           |
|                      | 10 <sup>f</sup>   | 06 <sup>c</sup>   | 15 <sup>d</sup>  | 18 <sup>c</sup>   | .04 <sup>a</sup>  | .08 <sup>b</sup> | 12 <sup>c</sup>    | 06 <sup>b</sup>   | .27 <sup>a</sup>  | .77 <sup>a</sup>  | .25 <sup>a</sup>  | .16 <sup>a</sup>  |
| <b>Ala</b>           | 22.63±1           | 24.84±0           | 32.54±0          | 29.62±0           | 38.58±0           | 30.17±0          | 17.79±0            | 27.73±0           | 45.13±0           | 40.27±0           | 39.04±0           | 35.86±0           |
|                      | .58 <sup>c</sup>  | .24 <sup>d</sup>  | .79 <sup>b</sup> | .59 <sup>c</sup>  | .11 <sup>a</sup>  | .12 <sup>c</sup> | .57 <sup>c</sup>   | .24 <sup>d</sup>  | .87 <sup>a</sup>  | .22 <sup>b</sup>  | .79 <sup>b</sup>  | .39 <sup>c</sup>  |
| <b>Cys</b>           | 0.00±0.           | 1.13±0.           | 1.91±0.          | 2.11±0.           | 2.92±0.           | 2.02±0.          | 0.49±0.            | 0.82±0.           | 2.59±0.           | 3.43±0.           | 3.04±0.           | 2.24±0.           |
|                      | 00 <sup>c</sup>   | 01 <sup>d</sup>   | 10 <sup>c</sup>  | 04 <sup>b</sup>   | 06 <sup>a</sup>   | 04 <sup>bc</sup> | 04 <sup>f</sup>    | 02 <sup>c</sup>   | 06 <sup>c</sup>   | 05 <sup>a</sup>   | 04 <sup>b</sup>   | 05 <sup>d</sup>   |
| <b>Val</b>           | 12.65±0           | 16.31±0           | 23.49±0          | 23.76±0           | 30.42±0           | 25.03±0          | 12.41±0            | 16.76±0           | 31.62±0           | 33.29±0           | 33.22±0           | 29.19±0           |
|                      | .24 <sup>c</sup>  | .15 <sup>d</sup>  | .41 <sup>c</sup> | .46 <sup>c</sup>  | .16 <sup>a</sup>  | .11 <sup>b</sup> | .49 <sup>c</sup>   | .24 <sup>d</sup>  | .59 <sup>b</sup>  | .27 <sup>a</sup>  | .64 <sup>a</sup>  | .13 <sup>c</sup>  |
| <b>Met</b>           | 1.51±0.           | 3.84±0.           | 8.37±0.          | 9.71±0.           | 12.05±0           | 10.89±0          | 1.30±0.            | 3.41±0.           | 11.84±0           | 12.59±0           | 11.83±0           | 12.02±0           |
|                      | 06 <sup>f</sup>   | 03 <sup>c</sup>   | 16 <sup>d</sup>  | 18 <sup>c</sup>   | .23 <sup>a</sup>  | .11 <sup>b</sup> | 03 <sup>d</sup>    | 09 <sup>c</sup>   | .25 <sup>b</sup>  | .20 <sup>a</sup>  | .06 <sup>b</sup>  | .19 <sup>b</sup>  |
| <b>Ile</b>           | 4.05±0.           | 6.42±0.           | 13.54±0          | 13.64±0           | 17.45±0           | 15.54±0          | 4.04±0.            | 6.63±0.           | 17.22±0           | 19.20±0           | 18.76±0           | 18.52±0           |
|                      | 11 <sup>c</sup>   | 07 <sup>d</sup>   | .21 <sup>c</sup> | .26 <sup>c</sup>  | .10 <sup>a</sup>  | .09 <sup>b</sup> | 14 <sup>c</sup>    | 06 <sup>d</sup>   | .34 <sup>c</sup>  | .12 <sup>a</sup>  | .34 <sup>ab</sup> | .02 <sup>b</sup>  |
| <b>Leu</b>           | 5.31±0.           | 13.37±0           | 27.79±0          | 31.08±0           | 39.73±0           | 36.90±0          | 4.55±0.            | 11.37±0           | 39.98±0           | 42.17±0           | 41.61±0           | 41.53±0           |
|                      | 08 <sup>f</sup>   | .13 <sup>c</sup>  | .45 <sup>d</sup> | .63 <sup>c</sup>  | .24 <sup>a</sup>  | .24 <sup>b</sup> | 23 <sup>d</sup>    | .07 <sup>c</sup>  | .80 <sup>b</sup>  | .32 <sup>a</sup>  | .76 <sup>a</sup>  | .13 <sup>a</sup>  |

|                  |                   |                   |                   |                   |                   |                   |                   |                   |                    |                   |                   |                   |
|------------------|-------------------|-------------------|-------------------|-------------------|-------------------|-------------------|-------------------|-------------------|--------------------|-------------------|-------------------|-------------------|
| <b>Tyr</b>       | 5.80±0.           | 11.84±0           | 20.56±0           | 20.99±0           | 25.44±0           | 23.70±0           | 6.76±0.           | 11.96±0           | 28.39±0            | 29.14±0           | 27.05±0           | 25.98±0           |
|                  | .16 <sup>e</sup>  | .13 <sup>d</sup>  | .27 <sup>c</sup>  | .54 <sup>c</sup>  | .18 <sup>a</sup>  | .27 <sup>b</sup>  | .33 <sup>e</sup>  | .18 <sup>d</sup>  | .57 <sup>a</sup>   | .19 <sup>a</sup>  | .39 <sup>b</sup>  | .13 <sup>c</sup>  |
| <b>Phe</b>       | 6.41±0.           | 18.96±0           | 32.88±0           | 34.77±0           | 38.09±1           | 35.34±0           | 6.93±0.           | 16.62±0           | 44.84±0            | 44.14±0           | 40.39±1           | 39.09±0           |
|                  | .12 <sup>e</sup>  | .14 <sup>d</sup>  | .47 <sup>c</sup>  | .63 <sup>b</sup>  | .28 <sup>a</sup>  | .23 <sup>b</sup>  | .30 <sup>d</sup>  | .23 <sup>c</sup>  | .95 <sup>a</sup>   | .30 <sup>a</sup>  | .43 <sup>b</sup>  | .60 <sup>b</sup>  |
| <b>Lys</b>       | 9.57±0.           | 19.23±0           | 31.21±0           | 33.05±0           | 38.91±0           | 36.53±0           | 9.84±0.           | 16.87±0           | 42.56±0            | 45.03±0           | 42.51±0           | 40.44±0           |
|                  | .12 <sup>f</sup>  | .14 <sup>c</sup>  | .47 <sup>d</sup>  | .65 <sup>c</sup>  | .25 <sup>a</sup>  | .23 <sup>b</sup>  | .39 <sup>e</sup>  | .16 <sup>d</sup>  | .85 <sup>b</sup>   | .24 <sup>a</sup>  | .79 <sup>b</sup>  | .07 <sup>c</sup>  |
| <b>His</b>       | 6.29±0.           | 8.95±0.           | 12.52±0           | 11.58±0           | 12.77±0           | 11.31±0           | 7.80±0.           | 10.86±0           | 16.24±0            | 15.88±0           | 15.90±0           | 12.41±0           |
|                  | .78 <sup>d</sup>  | .06 <sup>c</sup>  | .05 <sup>a</sup>  | .24 <sup>b</sup>  | .09 <sup>a</sup>  | .12 <sup>b</sup>  | .22 <sup>d</sup>  | .09 <sup>c</sup>  | .35 <sup>a</sup>   | .24 <sup>a</sup>  | .23 <sup>a</sup>  | .07 <sup>b</sup>  |
| <b>Arg</b>       | 8.28±0.           | 13.41±0           | 23.83±0           | 26.58±0           | 31.72±0           | 30.07±0           | 8.42±0.           | 16.08±0           | 32.55±0            | 36.71±0           | 37.54±0           | 34.33±0           |
|                  | .30 <sup>f</sup>  | .10 <sup>c</sup>  | .45 <sup>d</sup>  | .57 <sup>c</sup>  | .28 <sup>a</sup>  | .20 <sup>b</sup>  | .26 <sup>e</sup>  | .04 <sup>d</sup>  | .76 <sup>c</sup>   | .41 <sup>a</sup>  | .61 <sup>a</sup>  | .10 <sup>b</sup>  |
| <b>Pro</b>       | 6.25±0.           | 9.77±0.           | 17.69±0           | 17.25±0           | 22.08±0           | 16.15±0           | 4.96±0.           | 9.81±0.           | 20.85±0            | 21.39±0           | 21.51±0           | 17.89±0           |
|                  | .23 <sup>e</sup>  | .10 <sup>d</sup>  | .31 <sup>b</sup>  | .18 <sup>b</sup>  | .69 <sup>a</sup>  | .29 <sup>c</sup>  | .18 <sup>d</sup>  | .11 <sup>c</sup>  | .22 <sup>a</sup>   | .51 <sup>a</sup>  | .52 <sup>a</sup>  | .29 <sup>b</sup>  |
| <b>Umami</b>     | 31.50±0           | 27.42±0           | 66.44±0           | 61.34±1           | 63.72±1           | 62.59±0           | 28.22±0           | 33.07±0           | 89.17±1            | 77.61±0           | 71.64±0           | 67.82±0           |
|                  | .82 <sup>c</sup>  | .13 <sup>d</sup>  | .93 <sup>a</sup>  | .72 <sup>b</sup>  | .63 <sup>ab</sup> | .72 <sup>b</sup>  | .90 <sup>f</sup>  | .53 <sup>c</sup>  | .69 <sup>a</sup>   | .88 <sup>b</sup>  | .73 <sup>c</sup>  | .69 <sup>d</sup>  |
| <b>Bitter</b>    | 58.36±1           | 108.49±           | 185.83±           | 195.46±           | 234.54±           | 214.42±           | 60.75±2           | 107.15±           | 253.40±            | 265.56±           | 256.97±           | 241.50±           |
|                  | .83 <sup>f</sup>  | 0.38 <sup>e</sup> | 0.25 <sup>d</sup> | 3.94 <sup>c</sup> | 0.68 <sup>a</sup> | 1.42 <sup>b</sup> | .26 <sup>c</sup>  | 0.90 <sup>d</sup> | 5.20 <sup>b</sup>  | 1.96 <sup>a</sup> | 2.35 <sup>b</sup> | 0.35 <sup>c</sup> |
| <b>Sweet</b>     | 166.20±           | 182.01±           | 175.92±           | 154.45±           | 202.67±           | 129.55±           | 160.31±           | 185.11±           | 268.77±            | 210.81±           | 221.05±           | 149.37±           |
|                  | 5.08 <sup>c</sup> | 1.28 <sup>b</sup> | 0.79 <sup>b</sup> | 3.15 <sup>d</sup> | 2.03 <sup>a</sup> | 0.22 <sup>c</sup> | 5.37 <sup>d</sup> | 2.23 <sup>c</sup> | 3.66 <sup>a</sup>  | 5.24 <sup>b</sup> | 2.83 <sup>b</sup> | 1.09 <sup>c</sup> |
| <b>Total FAA</b> | 262.30±           | 328.82±           | 447.79±           | 430.61±           | 525.93±           | 424.74±           | 254.72±           | 335.96±           | 634.78±            | 578.81±           | 574.21±           | 478.82±           |
|                  | 7.66 <sup>e</sup> | 0.99 <sup>d</sup> | 1.60 <sup>b</sup> | 8.95 <sup>c</sup> | 3.93 <sup>a</sup> | 2.60 <sup>c</sup> | 7.42 <sup>e</sup> | 3.58 <sup>d</sup> | 10.33 <sup>a</sup> | 3.14 <sup>b</sup> | 5.91 <sup>b</sup> | 1.26 <sup>c</sup> |
| <b>JFB</b>       |                   |                   |                   |                   |                   | <b>JAB</b>        |                   |                   |                    |                   |                   |                   |
| <b>Asp</b>       | <b>D0</b>         | <b>D1</b>         | <b>D4</b>         | <b>D7</b>         | <b>D14</b>        | <b>D30</b>        | <b>D0</b>         | <b>D1</b>         | <b>D4</b>          | <b>D7</b>         | <b>D14</b>        | <b>D30</b>        |
|                  | 17.68±0           | 10.94±0           | 27.11±0           | 20.59±0           | 16.09±0           | 11.34±0           | 11.44±0           | 26.72±0           | 34.86±1            | 34.04±0           | 24.54±1           | 24.95±0           |
| <b>Thr</b>       | .10 <sup>c</sup>  | .16 <sup>c</sup>  | .14 <sup>a</sup>  | .25 <sup>b</sup>  | .38 <sup>d</sup>  | .20 <sup>c</sup>  | .40 <sup>c</sup>  | .32 <sup>b</sup>  | .94 <sup>a</sup>   | .77 <sup>a</sup>  | .97 <sup>b</sup>  | .36 <sup>b</sup>  |
|                  | 53.15±1           | 66.69±0           | 71.51±0           | 42.16±0           | 26.32±0           | 11.56±0           | 67.86±0           | 72.38±0           | 99.06±1            | 68.47±1           | 24.91±1           | 12.21±0           |
|                  | .54 <sup>c</sup>  | .51 <sup>b</sup>  | .38 <sup>a</sup>  | .45 <sup>d</sup>  | .49 <sup>c</sup>  | .40 <sup>f</sup>  | .63 <sup>b</sup>  | .80 <sup>b</sup>  | 0.37 <sup>a</sup>  | .93 <sup>b</sup>  | .32 <sup>c</sup>  | .26 <sup>d</sup>  |

|            |                             |                             |                             |                             |                             |                             |                             |                              |                              |                             |                              |                              |
|------------|-----------------------------|-----------------------------|-----------------------------|-----------------------------|-----------------------------|-----------------------------|-----------------------------|------------------------------|------------------------------|-----------------------------|------------------------------|------------------------------|
| <b>Ser</b> | 11.90±0<br>.13 <sup>d</sup> | 16.53±0<br>.07 <sup>b</sup> | 20.87±0<br>.06 <sup>a</sup> | 13.18±0<br>.10 <sup>c</sup> | 11.47±0<br>.35 <sup>d</sup> | 6.74±0.<br>17 <sup>c</sup>  | 16.20±0<br>.34 <sup>d</sup> | 19.77±0<br>.30 <sup>c</sup>  | 22.42±1<br>.77 <sup>b</sup>  | 25.91±0<br>.69 <sup>a</sup> | 17.54±1<br>.30 <sup>cd</sup> | 16.62±0<br>.11 <sup>d</sup>  |
| <b>Glu</b> | 11.33±0<br>.27 <sup>c</sup> | 10.79±0<br>.05 <sup>c</sup> | 19.89±0<br>.11 <sup>a</sup> | 14.74±0<br>.27 <sup>b</sup> | 11.26±0<br>.46 <sup>c</sup> | 7.66±0.<br>06 <sup>d</sup>  | 19.49±0<br>.52 <sup>b</sup> | 14.89±0<br>.50 <sup>cd</sup> | 20.59±0<br>.72 <sup>b</sup>  | 22.76±0<br>.75 <sup>a</sup> | 16.49±0<br>.90 <sup>c</sup>  | 13.16±0<br>.29 <sup>d</sup>  |
| <b>Gly</b> | 2.32±0.<br>00 <sup>d</sup>  | 4.23±0.<br>05 <sup>c</sup>  | 6.33±0.<br>03 <sup>a</sup>  | 4.52±0.<br>02 <sup>b</sup>  | 2.27±0.<br>11 <sup>d</sup>  | 1.00±0.<br>06 <sup>c</sup>  | 2.20±0.<br>05 <sup>c</sup>  | 4.25±0.<br>12 <sup>bc</sup>  | 7.88±0.<br>26 <sup>a</sup>   | 7.32±0.<br>24 <sup>a</sup>  | 6.45±2.<br>10 <sup>ab</sup>  | 7.22±0.<br>15 <sup>a</sup>   |
| <b>Ala</b> | 14.85±0<br>.15 <sup>c</sup> | 20.19±0<br>.28 <sup>b</sup> | 27.18±0<br>.13 <sup>a</sup> | 18.90±0<br>.12 <sup>c</sup> | 16.08±0<br>.33 <sup>d</sup> | 9.15±0.<br>16 <sup>f</sup>  | 18.89±0<br>.47 <sup>c</sup> | 21.80±0<br>.62 <sup>d</sup>  | 28.47±1<br>.21 <sup>b</sup>  | 33.28±0<br>.76 <sup>a</sup> | 24.49±0<br>.38 <sup>c</sup>  | 20.19±0<br>.60 <sup>dc</sup> |
| <b>Cys</b> | 0.00±0.<br>00 <sup>f</sup>  | 0.77±0.<br>04 <sup>d</sup>  | 1.25±0.<br>04 <sup>a</sup>  | 0.96±0.<br>03 <sup>c</sup>  | 1.04±0.<br>01 <sup>b</sup>  | 0.68±0.<br>02 <sup>c</sup>  | 0.00±0.<br>00 <sup>d</sup>  | 0.84±0.<br>07 <sup>c</sup>   | 1.29±0.<br>07 <sup>ab</sup>  | 1.45±0.<br>05 <sup>a</sup>  | 1.05±0.<br>03 <sup>bc</sup>  | 1.02±0.<br>18 <sup>c</sup>   |
| <b>Val</b> | 8.14±0.<br>07 <sup>d</sup>  | 11.45±0<br>.05 <sup>c</sup> | 16.76±0<br>.09 <sup>a</sup> | 12.81±0<br>.11 <sup>b</sup> | 12.80±0<br>.15 <sup>b</sup> | 8.13±0.<br>09 <sup>d</sup>  | 7.72±0.<br>16 <sup>f</sup>  | 12.77±0<br>.25 <sup>c</sup>  | 20.45±0<br>.81 <sup>b</sup>  | 24.96±0<br>.57 <sup>a</sup> | 18.40±0<br>.47 <sup>c</sup>  | 16.56±0<br>.18 <sup>d</sup>  |
| <b>Met</b> | 0.63±0.<br>01 <sup>f</sup>  | 2.05±0.<br>04 <sup>c</sup>  | 5.93±0.<br>11 <sup>a</sup>  | 4.73±0.<br>02 <sup>c</sup>  | 4.93±0.<br>11 <sup>b</sup>  | 3.06±0.<br>03 <sup>d</sup>  | 0.75±0.<br>02 <sup>c</sup>  | 3.34±0.<br>06 <sup>d</sup>   | 7.53±0.<br>35 <sup>b</sup>   | 9.85±0.<br>11 <sup>a</sup>  | 7.64±0.<br>18 <sup>b</sup>   | 6.01±0.<br>09 <sup>c</sup>   |
| <b>Ile</b> | 3.45±0.<br>02 <sup>f</sup>  | 4.65±0.<br>04 <sup>d</sup>  | 8.53±0.<br>08 <sup>a</sup>  | 6.56±0.<br>08 <sup>c</sup>  | 7.38±0.<br>08 <sup>b</sup>  | 4.19±0.<br>05 <sup>c</sup>  | 2.54±0.<br>05 <sup>c</sup>  | 5.48±0.<br>13 <sup>d</sup>   | 10.34±0<br>.52 <sup>bc</sup> | 14.90±0<br>.43 <sup>a</sup> | 10.88±0<br>.28 <sup>b</sup>  | 9.52±0.<br>14 <sup>c</sup>   |
| <b>Leu</b> | 3.00±0.<br>05 <sup>f</sup>  | 7.41±0.<br>12 <sup>c</sup>  | 20.67±0<br>.14 <sup>a</sup> | 16.01±0<br>.20 <sup>c</sup> | 18.05±0<br>.24 <sup>b</sup> | 10.55±0<br>.14 <sup>d</sup> | 2.40±0.<br>06 <sup>c</sup>  | 11.40±0<br>.19 <sup>d</sup>  | 24.25±1<br>.14 <sup>b</sup>  | 34.65±1<br>.00 <sup>a</sup> | 25.87±0<br>.69 <sup>b</sup>  | 21.62±0<br>.36 <sup>c</sup>  |
| <b>Tyr</b> | 5.52±0.<br>08 <sup>c</sup>  | 7.91±0.<br>10 <sup>d</sup>  | 15.65±0<br>.11 <sup>a</sup> | 13.06±0<br>.20 <sup>b</sup> | 12.72±0<br>.28 <sup>b</sup> | 8.49±0.<br>04 <sup>c</sup>  | 4.28±0.<br>08 <sup>c</sup>  | 10.44±0<br>.08 <sup>d</sup>  | 16.91±0<br>.71 <sup>b</sup>  | 22.04±0<br>.63 <sup>a</sup> | 16.69±0<br>.47 <sup>b</sup>  | 12.68±0<br>.19 <sup>c</sup>  |
| <b>Phe</b> | 5.08±0.<br>08 <sup>c</sup>  | 9.45±0.<br>04 <sup>d</sup>  | 27.51±0<br>.18 <sup>a</sup> | 22.72±0<br>.31 <sup>b</sup> | 23.88±1<br>.43 <sup>b</sup> | 14.97±0<br>.13 <sup>c</sup> | 3.59±0.<br>09 <sup>d</sup>  | 22.68±4<br>.27 <sup>c</sup>  | 30.82±0<br>.53 <sup>b</sup>  | 41.27±1<br>.06 <sup>a</sup> | 31.79±0<br>.65 <sup>b</sup>  | 24.25±0<br>.49 <sup>c</sup>  |
| <b>Lys</b> | 8.71±0.<br>10 <sup>f</sup>  | 13.43±0<br>.13 <sup>d</sup> | 24.16±0<br>.16 <sup>a</sup> | 18.53±0<br>.17 <sup>c</sup> | 19.08±0<br>.20 <sup>b</sup> | 12.10±0<br>.11 <sup>c</sup> | 6.01±0.<br>18 <sup>c</sup>  | 15.23±0<br>.22 <sup>d</sup>  | 26.50±1<br>.25 <sup>b</sup>  | 31.21±0<br>.58 <sup>a</sup> | 24.87±0<br>.63 <sup>b</sup>  | 20.59±0<br>.26 <sup>c</sup>  |
| <b>His</b> | 4.18±0.<br>48 <sup>c</sup>  | 6.21±0.<br>04 <sup>b</sup>  | 8.29±0.<br>08 <sup>a</sup>  | 5.94±0.<br>11 <sup>b</sup>  | 4.24±0.<br>11 <sup>c</sup>  | 2.59±0.<br>07 <sup>d</sup>  | 4.27±0.<br>08 <sup>d</sup>  | 6.97±0.<br>03 <sup>b</sup>   | 6.99±0.<br>37 <sup>b</sup>   | 10.87±0<br>.29 <sup>a</sup> | 5.50±0.<br>14 <sup>c</sup>   | 5.27±0.<br>90 <sup>cd</sup>  |

|                  |                              |                              |                              |                              |                              |                              |                              |                              |                              |                               |                               |                              |
|------------------|------------------------------|------------------------------|------------------------------|------------------------------|------------------------------|------------------------------|------------------------------|------------------------------|------------------------------|-------------------------------|-------------------------------|------------------------------|
| <b>Arg</b>       | 4.81±0.<br>08 <sup>f</sup>   | 8.18±0.<br>06 <sup>d</sup>   | 16.64±0<br>.12 <sup>a</sup>  | 12.25±0<br>.21 <sup>c</sup>  | 12.83±0<br>.37 <sup>b</sup>  | 7.05±0.<br>18 <sup>c</sup>   | 4.17±0.<br>14 <sup>c</sup>   | 11.73±0<br>.19 <sup>d</sup>  | 19.20±0<br>.78 <sup>b</sup>  | 26.34±0<br>.88 <sup>a</sup>   | 18.82±0<br>.58 <sup>b</sup>   | 15.55±0<br>.23 <sup>c</sup>  |
| <b>Pro</b>       | 4.02±0.<br>27 <sup>d</sup>   | 6.58±0.<br>17 <sup>c</sup>   | 12.31±0<br>.11 <sup>a</sup>  | 9.33±0.<br>15 <sup>b</sup>   | 12.65±1<br>.18 <sup>a</sup>  | 9.51±0.<br>28 <sup>b</sup>   | 4.69±0.<br>36 <sup>d</sup>   | 9.23±0.<br>41 <sup>c</sup>   | 13.96±0<br>.33 <sup>b</sup>  | 17.46±0<br>.27 <sup>a</sup>   | 13.18±2<br>.74 <sup>b</sup>   | 15.48±0<br>.23 <sup>ab</sup> |
| <b>Umami</b>     | 29.01±0                      | 21.74±0                      | 47.00±0                      | 35.33±0                      | 27.35±0                      | 19.00±0                      | 30.93±0                      | 41.61±0                      | 55.44±1                      | 56.80±1                       | 41.03±2                       | 38.11±0                      |
| <b>FAA</b>       | .35 <sup>c</sup>             | .13 <sup>c</sup>             | .22 <sup>a</sup>             | .51 <sup>b</sup>             | .83 <sup>d</sup>             | .24 <sup>f</sup>             | .50 <sup>c</sup>             | .75 <sup>b</sup>             | .31 <sup>a</sup>             | .39 <sup>a</sup>              | .86 <sup>b</sup>              | .25 <sup>b</sup>             |
| <b>Bitter</b>    | 42.88±0                      | 68.70±0                      | 138.20±                      | 107.88±                      | 110.98±                      | 68.06±0                      | 34.98±0                      | 96.69±3                      | 155.47±                      | 206.24±                       | 152.81±                       | 126.04±                      |
| <b>FAA</b>       | .57 <sup>d</sup>             | .18 <sup>c</sup>             | 0.77 <sup>a</sup>            | 1.36 <sup>b</sup>            | 2.74 <sup>b</sup>            | .75 <sup>c</sup>             | .51 <sup>c</sup>             | .28 <sup>d</sup>             | 4.57 <sup>b</sup>            | 5.23 <sup>a</sup>             | 3.90 <sup>b</sup>             | 1.85 <sup>c</sup>            |
| <b>Sweet</b>     | 82.85±1                      | 109.70±                      | 131.83±                      | 83.49±0                      | 61.07±0                      | 31.51±0                      | 105.90±                      | 121.53±                      | 165.35±                      | 144.81±                       | 81.02±5                       | 62.25±0                      |
| <b>FAA</b>       | .32 <sup>c</sup>             | 0.37 <sup>b</sup>            | 0.52 <sup>a</sup>            | .65 <sup>c</sup>             | .50 <sup>d</sup>             | .71 <sup>c</sup>             | 1.44 <sup>d</sup>            | 1.86 <sup>c</sup>            | 10.61 <sup>a</sup>           | 3.50 <sup>b</sup>             | .22 <sup>c</sup>              | .42 <sup>f</sup>             |
| <b>Total FAA</b> | 158.76±<br>1.42 <sup>c</sup> | 207.49±<br>0.40 <sup>d</sup> | 330.60±<br>1.38 <sup>a</sup> | 236.99±<br>2.42 <sup>b</sup> | 213.08±<br>2.21 <sup>c</sup> | 128.77±<br>1.72 <sup>f</sup> | 176.49±<br>1.85 <sup>f</sup> | 269.89±<br>1.11 <sup>d</sup> | 391.50±<br>8.08 <sup>b</sup> | 426.76±<br>10.36 <sup>a</sup> | 289.10±<br>10.43 <sup>c</sup> | 242.90±<br>2.11 <sup>c</sup> |

Different superscript letters in the same row of PFB or PAB and JFB or JAB indicate significantly difference (n = 3,  $P < 0.05$ ).
